# Supplementary material
Source: PubMed Central journal article supplement (PMC3992710)
Supplement: NIHMS562924-supplement-Supplementary_Data.pdf [file NIHMS562924-supplement-Supplementary_Data.pdf]

Supplementary Materials for

**Nutrient Signaling in Protein Homeostasis: An Increase in Quantity at the Expense of Quality**

Crystal S. Conn and Shu-Bing Qian\*

\*Corresponding author. E-mail: sq38@cornell.edu

Published 16 April 2013, *Sci. Signal.* **6**, ra24 (2013)  
DOI: 10.1126/scisignal.2003520

**The PDF file includes:**

- Fig. S1. Quantification of Fluc mRNA abundance in wild-type and TSC2 knockout cells.
- Fig. S2. Phosphorylation status of eIF2 $\alpha$  in wild-type and TSC2 knockout cells.
- Fig. S3. Features of GFP in wild-type and TSC2 knockout cells.
- Fig. S4. Chaperone and proteasome activity in cells expressing Rheb.
- Fig. S5. Quantification of mRNA abundance of Fluc mutants in wild-type and TSC2 knockout cells.
- Fig. S6. Translation fidelity in cells expressing Rheb.
- Fig. S7. Ratio of 28S to 18S rRNAs in wild-type and TSC2 knockout cells.
- Fig. S8. Measurement of ribosome dynamics during translation elongation.

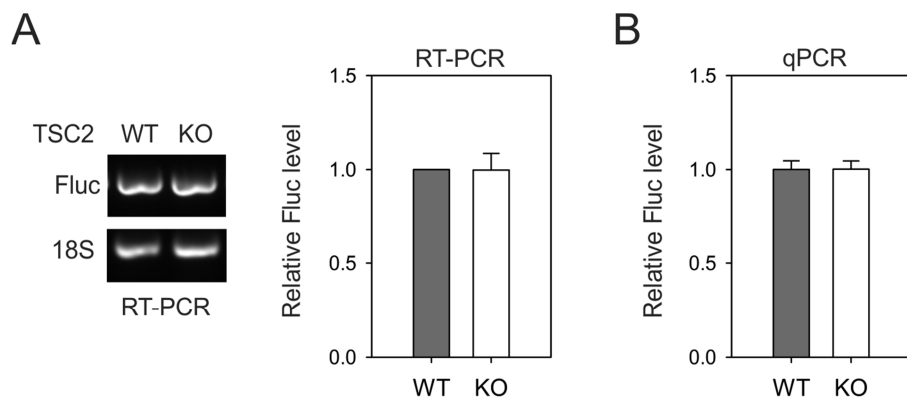

**Figure S1. Quantification of Fluc mRNA abundance in wild-type and TSC2 knockout cells.**

- (A) Total RNA was extracted from TSC2 wild-type and knockout MEFs transfected with Fluc plasmids followed by RT-PCR with Fluc and 18S primers (left panel). Quantification of Fluc mRNA abundance is normalized to 18S rRNA (right panel) (mean  $\pm$  SEM; n=3 independent experiments for PCR).
- (B) RNA was extracted as in (A) and quantitative RT-PCR used to measure abundance of Fluc mRNA normalized to  $\beta$ -actin (mean  $\pm$  SEM; n=3 independent experiments for qPCR).

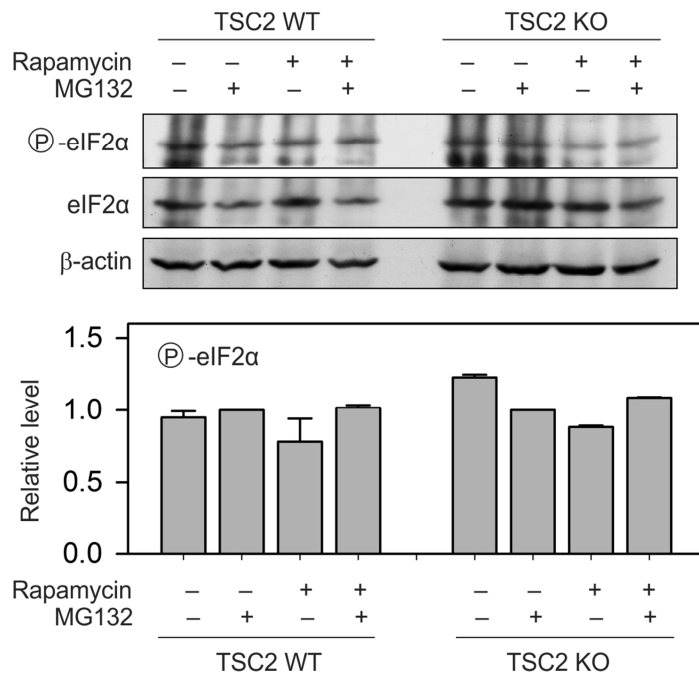

**Figure S2. Phosphorylation status of eIF2 $\alpha$  in wild-type and TSC2 knockout cells.** TSC2 wild-type and knockout cells were treated with 10 nM Rapamycin and/or 5  $\mu$ M MG132 for 15 hours. Whole cell lysates were immunoblotted using antibodies as indicated (top panel). Phosphorylation of eIF2 $\alpha$  was normalized to total eIF2 $\alpha$  (mean  $\pm$  SEM; n=3 independent experiments).

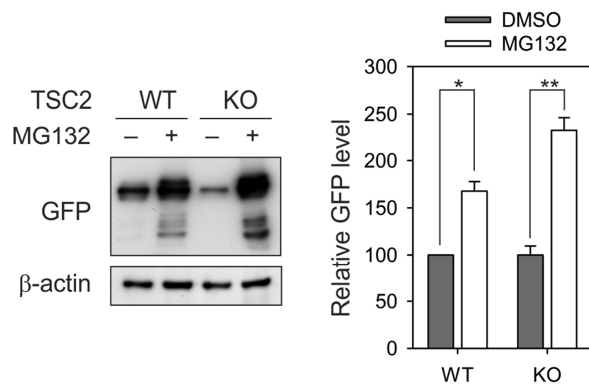

**Figure S3. Features of GFP in wild-type and TSC2 knockout cells.**

TSC2 wild-type and knockout cells transfected with myc-GFP plasmids were treated with 5  $\mu$ M MG132 for 15 hours. Whole cell lysates were immunoblotted as indicated (left panel). The abundance of GFP was normalized to that of  $\beta$ -actin (mean  $\pm$  SEM; n=3 independent experiments for blot; \*P = 0.022, \*\*P = 0.0077, Paired t-test).

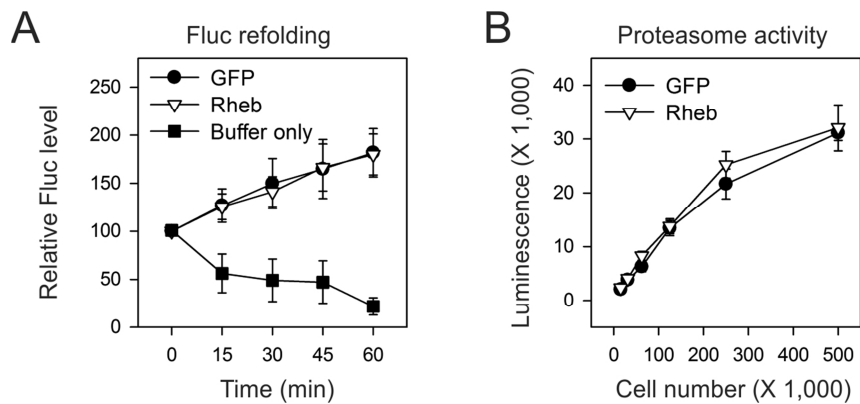

**Figure S4. Chaperone and proteasome activity in cells expressing Rheb.**

(A) Heat-denatured Fluc proteins were incubated with whole cell lysates derived from HEK293 cells expressing myc-GFP or myc-Rheb at room temperature. Fluc refolding was monitored by measuring Fluc activity at the time points indicated. Relative Fluc activities are presented (mean  $\pm$  SEM; n=3 independent experiments).

(B) HEK293 cells expressing myc-GFP or myc-Rheb were plated at the indicated concentrations and the intracellular chymotrypsin activity was measured by the luminescent reagent Proteasome-Glo (mean  $\pm$  SEM; n=3 independent experiments).

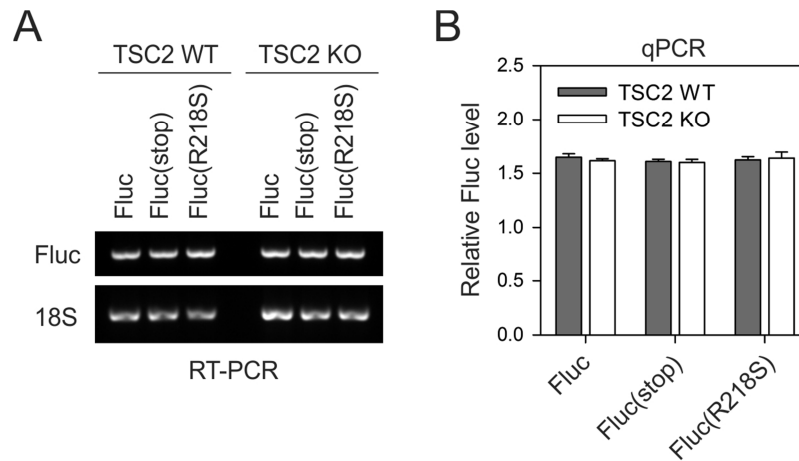

**Figure S5. Quantification of mRNA abundance of Fluc mutants in wild-type and TSC2 knockout cells.**

(A) RNA was extracted from TSC2 wild-type and knockout cells expressing wild-type or mutant Fluc plasmids followed by RT-PCR with Fluc and 18S primers.

(B) RNA was extracted as in (A) and quantitative RT-PCR used to measure abundance of Fluc mRNA normalized to  $\beta$ -actin (mean  $\pm$  SEM; n=3 independent experiments for qPCR).

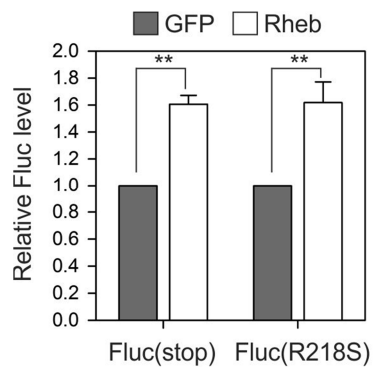

**Figure S6. Translation fidelity in cells expressing Rheb.**

HEK293 cells expressing myc-GFP or myc-Rheb were transfected with plasmids encoding Fluc mutants for 24 hours. Relative Fluc activity was normalized using wild-type Fluc (mean  $\pm$  SEM; n=5 independent experiments; \*\*p < 0.01, Ratio paired t-test).

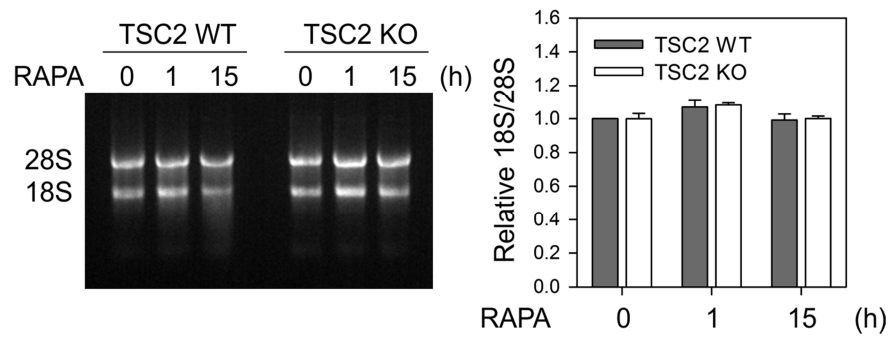

**Figure S7. Ratio of 28S to 18S rRNAs in wild-type and TSC2 knockout cells.**

RNA was extracted from wild-type and TSC2 knockout cells with or without 20 nM rapamycin treatment for the indicated times. RNA was run on a 1% agarose gel by electrophoresis (left panel). Relative ratios of 18S rRNA was compared to 28S rRNA (right panel) (mean  $\pm$  SEM; n=3 independent experiments).



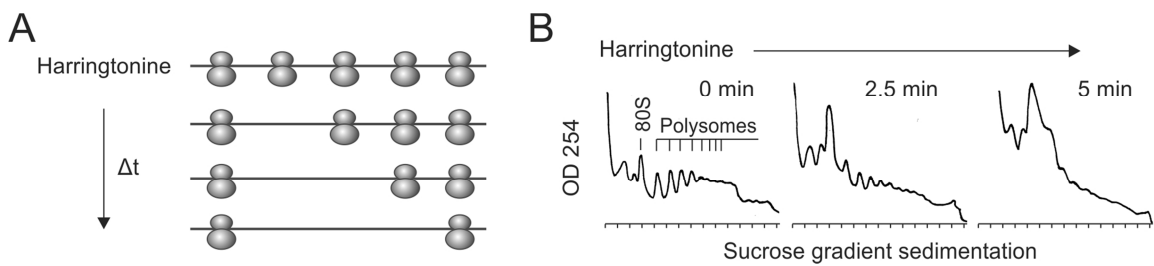

**Figure S8. Measurement of ribosome dynamics during translation elongation**

(A) Schematic of ribosome run-off in the presence of harringtonine.

(B) An example of polysome profiles of MEF cells in the presence of harringtonine (1  $\mu\text{g/ml}$ ) at the indicated times. Monosome (80S) and polysomes are highlighted and the P/M ratio change is quantified in Fig. 6B.
